# Supplementary figures and images for: Multiple developmental programs are altered by loss ofZic1andZic4to cause Dandy-Walker malformation cerebellar pathogenesis
Source: Oxford University Press journal article supplement (doi:10.1242/dev.054114), 2011-02-10

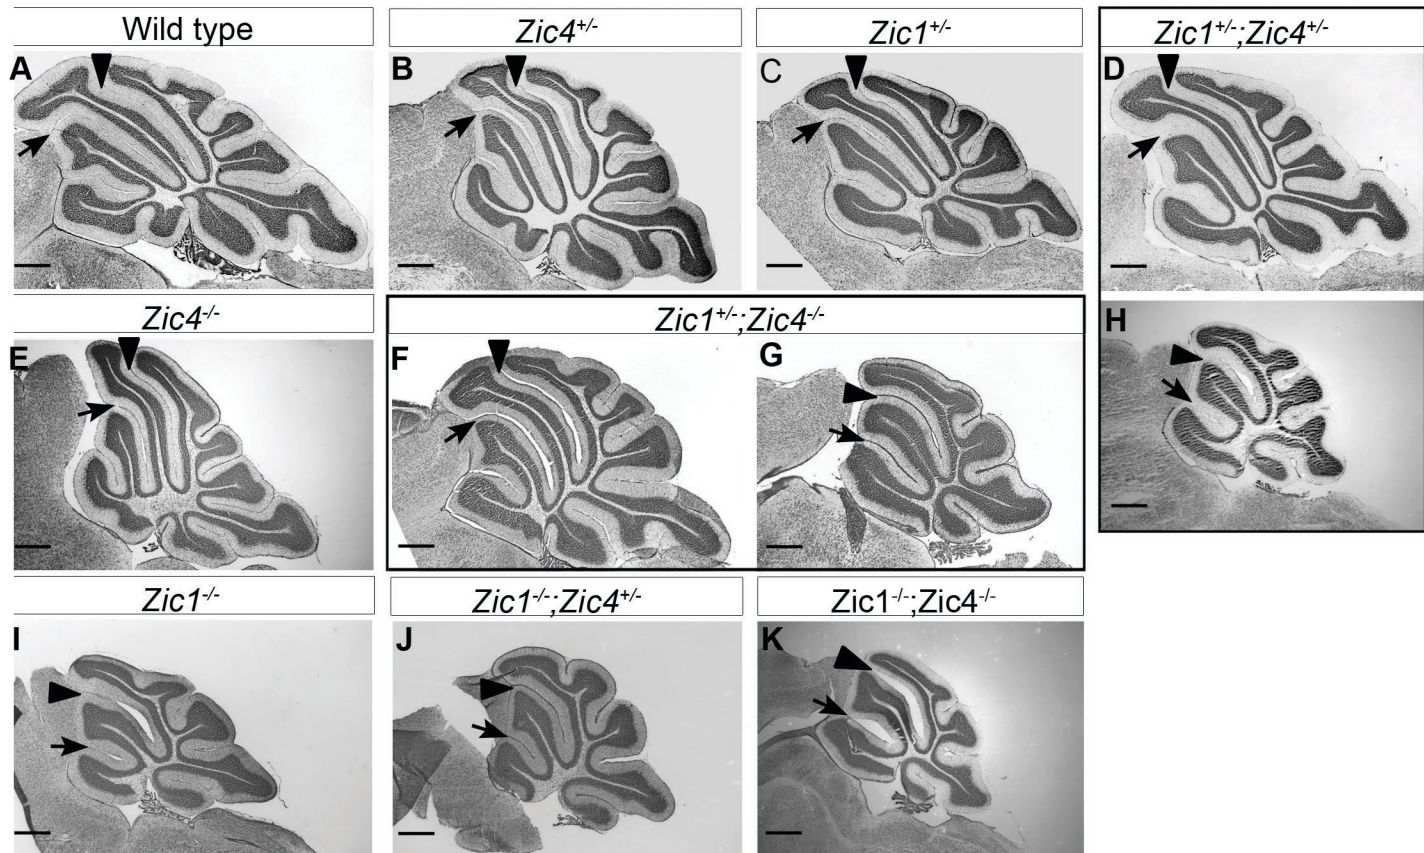

Supplement: dev054114figs1.pdf [file dev054114figs1.pdf]

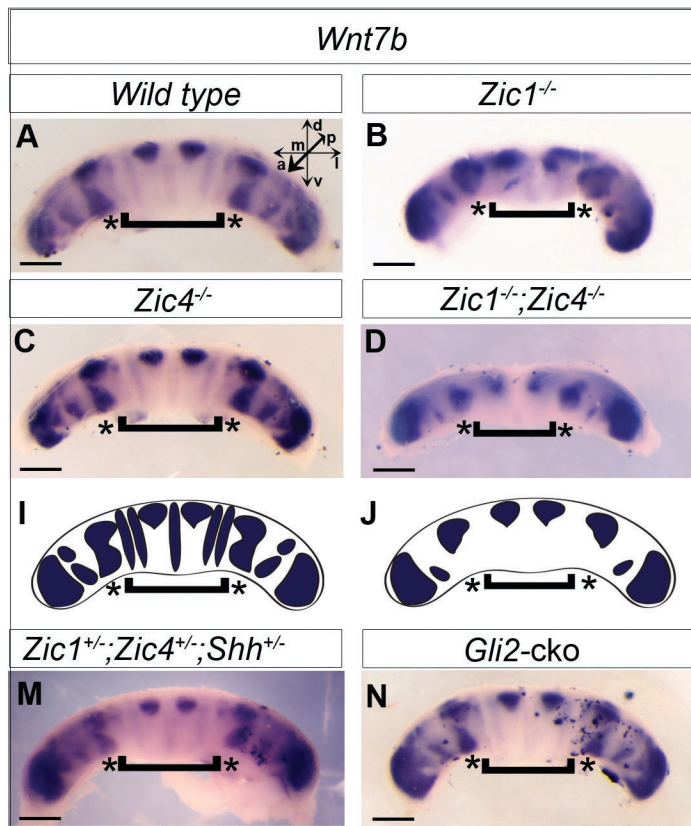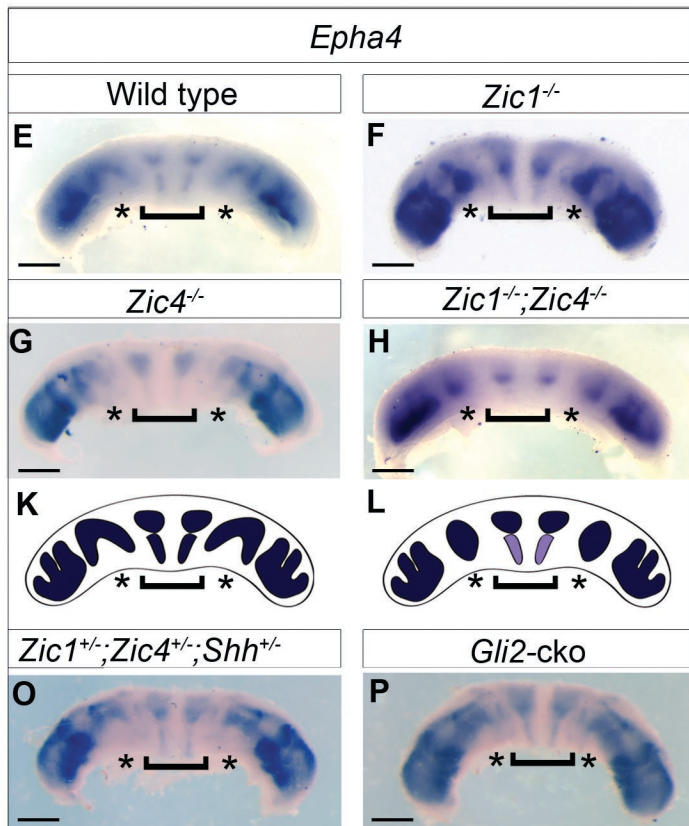

Supplement: dev054114figs2.pdf [file dev054114figs2.pdf]

Relative expression *Epha4*

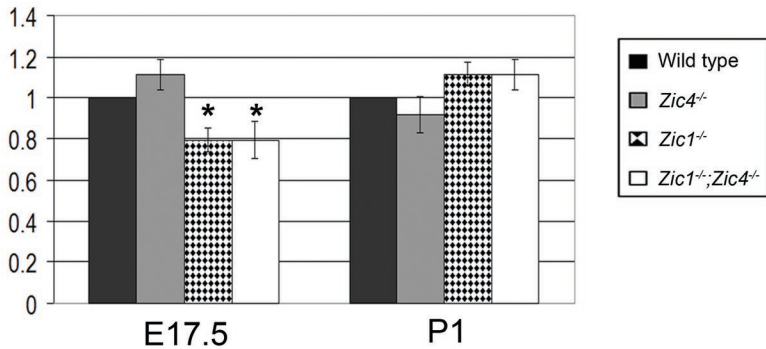

Supplement: dev054114figs3.pdf [file dev054114figs3.pdf]

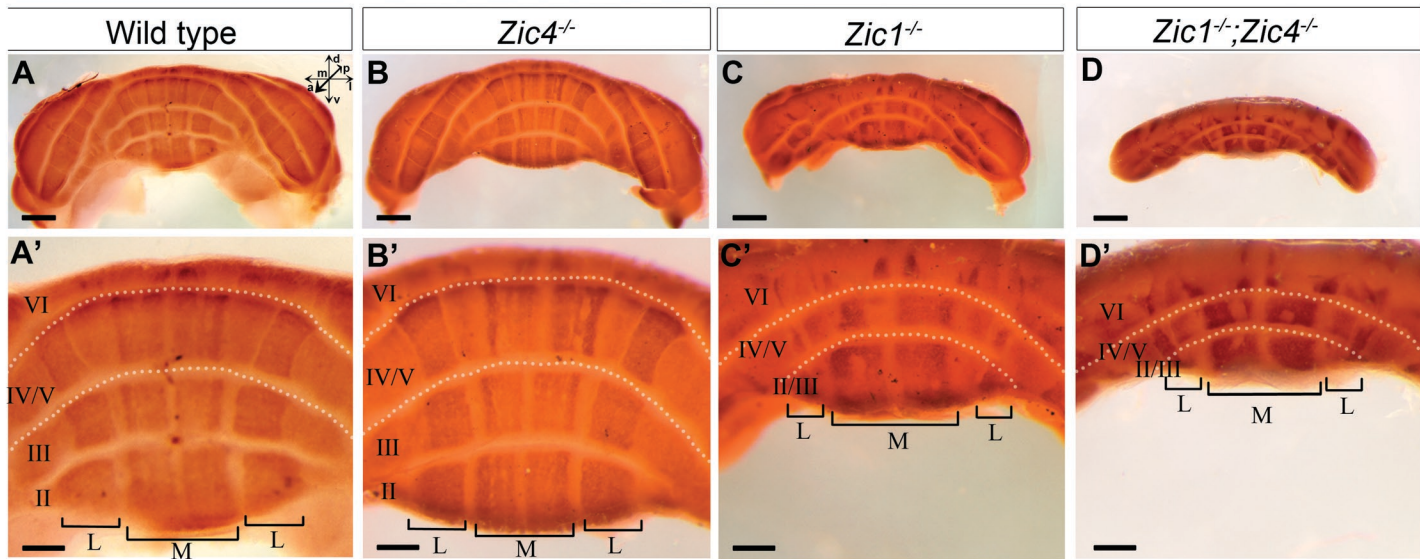

Supplement: dev054114figs4.pdf [file dev054114figs4.pdf]
